# Supplementary material for: Uptake of health checks by residents from the Danish social housing sector – a register-based cross-sectional study of patient characteristics in the ‘Your Life – Your Health’ program
Source: Springer Nature journal article supplement (doi:10.1186/s12889-018-5506-6), 2018-05-02
Supplement: MOESM1 [file 15733238]

## 1 **Additional file 1 – Direct Acyclic Graph (DAC) of determinants of** 2 **attendance to health checks**

3 Dryden et al performed a systematic review of what we know about who does and does not  
4 attend general health checks from the patients point of view (1). According to Dryden et al,  
5 attendance is higher with older age, female gender, being married and of higher socio-  
6 demographic, white ethnic background and frequent attendance to general practice. Contrary,  
7 people with health risk behaviour such as smokers, obese, people with unhealthy diet, heavy  
8 drinkers, and people with raised biomarkers such as high blood pressure, cholesterol and  
9 blood sugar, are less likely to attend. The higher attendance among married was explained by  
10 the fact that many, especially men, are encouraged by the partner to attend the health check.  
11 Socio-demographic factors include income, educational attainment and occupation and should  
12 be viewed as independent factors. Frequent attenders to general practice are more likely to  
13 attend general health checks. However, Dryden et al describe the association as being  
14 complex, that is, people use the same reasons for attendance and non-attendance. This is  
15 supported by a review of frequent attendance to general practice care where increasing age,  
16 being female, lack of social support, physiological disease and psychological distress are shown  
17 to predict frequent attendance (2).

18 Dryden et al also describe an association between social cognitive factors and attendance,  
19 though the relation is described as not being straightforward. As for frequent attendance,

20 people seem to use the same reasons for both attendance and non-attendance. Despite the  
21 complex relation, non-attenders show low self-efficacy, low control of health, and are less  
22 likely to believe in the effects of health checks. In a systematic review of qualitative studies on  
23 the perceptions and experiences of chronic disease programmes, Shaw et al provide a deeper  
24 look into the cognitive determinants that triggers uptake and effect (3). They present a  
25 conceptual model demonstrating that the cues to action, or inaction, to take up or respond to  
26 an intervention is determined by a combination of the patient's knowledge, beliefs, role and  
27 identity, followed by support to the prevention programmes. This includes the wider societal  
28 influences of the understanding of the role of, and trust in the state, and in more contextual  
29 influences made up of the health care professionals and health care sector support to  
30 preventive programmes.

31 Environmental factors such as neighbourhood deprivation seems to be associated with uptake  
32 while urban/rural residential area on the other hand seems unrelated to uptake (4). A number  
33 of papers report an increased uptake among people living in more deprived areas in the NHS  
34 Health Check (5,6). Other papers reporting from the NHS Health Check report higher uptake in  
35 less deprived areas (7–9). In a Danish setting, Bender et al show that low social capital and low  
36 social neighbourhood deprivation are associated with non-attendance to health checks, and  
37 that social capital is a likely mediator of the association between local neighbourhood  
38 deprivation and attendance to health checks (10,11).

39 When it comes to health care characteristics, several papers describe large differences in  
40 attendance between general practitioners (GPs), but the underlying causes of the association

41 is not described further (5,7,8,12). Distance to the GP does not seem to be associated with  
 42 attendance to health checks (7). Practice size seems to matter, though the results point to  
 43 higher attendance in both small and larger practices suggesting that practise size could be a  
 44 mediator of some other underlying factor (6,13). According to Shaw, information on the role of  
 45 health care professionals and uptake of preventive health checks is lacking (3).  
 46 Based on the aforementioned evidence a DAG was developed (figure 1).

47

48 Figure 1 - DAG depicting the determinants of attendance to health checks.

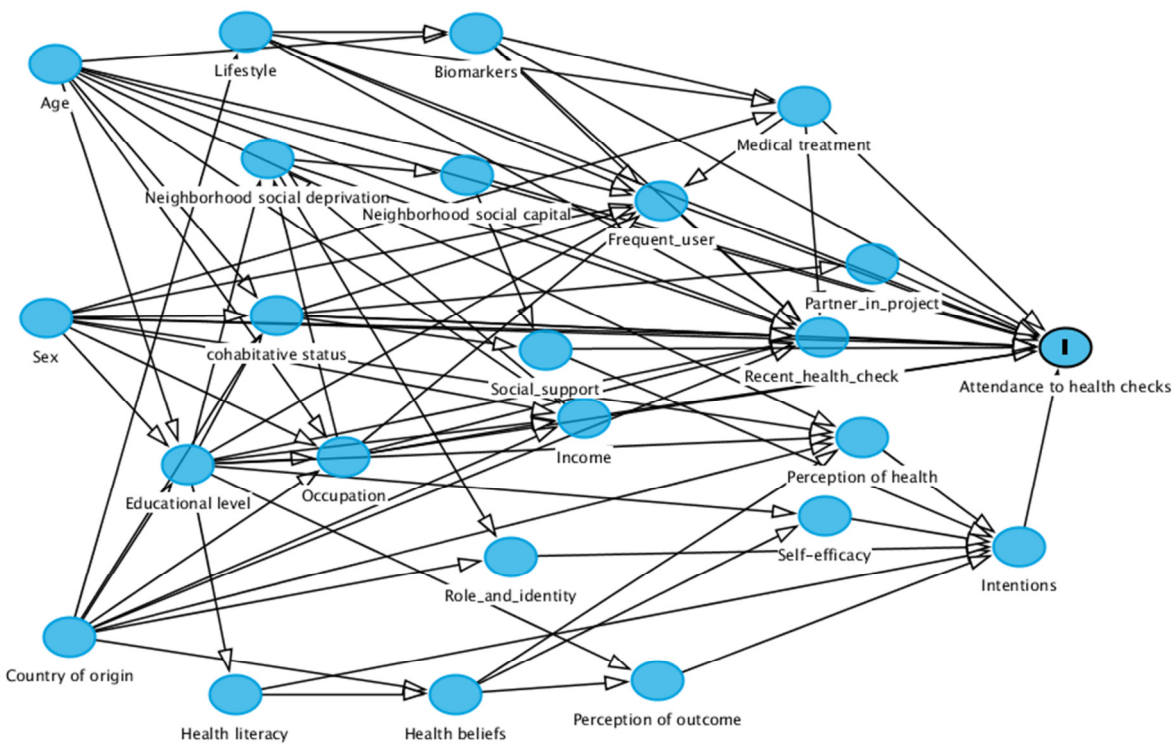

49 Can also be found at [www.dagitty.net/mtRW08f](http://www.dagitty.net/mtRW08f)

## 50 References

- 51 1. Dryden R, Williams B, McCowan C, Themessl-Huber M. What do we know about who  
52 does and does not attend general health checks? Findings from a narrative scoping  
53 review. *BMC Public Health*. 2012;12:723.
- 54 2. Vedsted P, Christensen MB. Frequent attenders in general practice care: a literature  
55 review with special reference to methodological considerations. *Public Health*. 2005  
56 Feb;119(2):118–37.
- 57 3. Shaw RL, Holland C, Pattison HM, Cooke R. Patients' perceptions and experiences of  
58 cardiovascular disease and diabetes prevention programmes: A systematic review and  
59 framework synthesis using the Theoretical Domains Framework. *Soc Sci Med* 1982. 2016  
60 May;156:192–203.
- 61 4. Hoebel J, Starker A, Jordan S, Richter M, Lampert T. Determinants of health check  
62 attendance in adults: findings from the cross-sectional German Health Update (GEDA)  
63 study. *BMC Public Health*. 2014;14(1):913.
- 64 5. Artac M, Dalton ARH, Babu H, Bates S, Millett C, Majeed A. Primary care and population  
65 factors associated with NHS Health Check coverage: a national cross-sectional study. *J*  
66 *Public Health Oxf Engl*. 2013 Sep;35(3):431–9.
- 67 6. Artac M, Dalton ARH, Majeed A, Car J, Huckvale K, Millett C. Uptake of the NHS Health  
68 Check programme in an urban setting. *Fam Pract*. 2013 Aug;30(4):426–35.
- 69 7. Gidlow C, Ellis N, Randall J, Cowap L, Smith G, Iqbal Z, et al. Method of invitation and  
70 geographical proximity as predictors of NHS Health Check uptake. *J Public Health Oxf*  
71 *Engl*. 2014 Nov 26;
- 72 8. Cochrane T, Gidlow CJ, Kumar J, Mawby Y, Iqbal Z, Chambers RM. Cross-sectional review  
73 of the response and treatment uptake from the NHS Health Checks programme in Stoke  
74 on Trent. *J Public Health Oxf Engl*. 2013 Mar;35(1):92–8.
- 75 9. Cook EJ, Sharp C, Randhawa G, Guppy A, Gangotra R, Cox J. Who uses NHS health  
76 checks? Investigating the impact of ethnicity and gender and method of invitation on  
77 uptake of NHS health checks. *Int J Equity Health*. 2016 Jan 20;15:13.
- 78 10. Bender AM, Kawachi I, Jørgensen T, Pisinger C. Neighborhood deprivation is strongly  
79 associated with participation in a population-based health check. *PloS One*.  
80 2015;10(6):e0129819.
- 81 11. Bender AM, Kawachi I, Jørgensen T, Pisinger C. Neighborhood social capital is associated  
82 with participation in health checks of a general population: a multilevel analysis of a

- 83 population-based lifestyle intervention- the Inter99 study. BMC Public Health.  
84 2015;15:694.
- 85 12. Lang S-J, Abel GA, Mant J, Mullis R. Impact of socioeconomic deprivation on screening for  
86 cardiovascular disease risk in a primary prevention population: a cross-sectional study.  
87 BMJ Open [Internet]. 2016 Mar 21 [cited 2017 Feb 15];6(3). Available from:  
88 <http://www.ncbi.nlm.nih.gov/pmc/articles/PMC4809080/>
- 89 13. Dalton ARH, Bottle A, Okoro C, Majeed A, Millett C. Uptake of the NHS Health Checks  
90 programme in a deprived, culturally diverse setting: cross-sectional study. J Public Health.  
91 2011 Sep 1;33(3):422–9.
- 92
