# Supplementary material for: Uptake of health checks by residents from the Danish social housing sector – a register-based cross-sectional study of patient characteristics in the ‘Your Life – Your Health’ program
Source: Springer Nature journal article supplement (doi:10.1186/s12889-018-5506-6), 2018-05-02
Supplement: MOESM2 [file 15733238]

## Additional file 2 – Analysis of the impact of missings in the association between attendance and the variable educational attainment

| Missings not included in the analysis |                                           |                                 |                        |                                 |
|---------------------------------------|-------------------------------------------|---------------------------------|------------------------|---------------------------------|
|                                       | Entire cohort (n=6217)                    |                                 | Nested cohort (n=1227) |                                 |
|                                       | Model 2 (age, sex)<br>IRR(95% CI) p-value | Model 3<br>(minimally adjusted) | Model 2<br>(age, sex)  | Model 3<br>(minimally adjusted) |
| < 10 år                               | ref                                       | ref                             | ref                    | ref                             |
| 10 – 15 år                            | 1.37 (1.25;1.51) 0.000                    | 1.36 (1.24;1.50) 0.000          | 1.47 (1.16;1.85) 0.001 | 1.45 (1.15;1.83) 0.002          |
| > 15 år                               | 1.57 (1.42;1.74) 0.000                    | 1.56 (1.41;1.73) 0.000          | 1.70 (1.32;2.19) 0.000 | 1.67 (1.30;2.15) 0.000          |

| Missings included in the analysis as a category |                                           |                                 |                       |                                 |
|-------------------------------------------------|-------------------------------------------|---------------------------------|-----------------------|---------------------------------|
|                                                 | Entire cohort (n=6649)                    |                                 | Nested cohort         |                                 |
|                                                 | Model 2 (age, sex)<br>IRR(95% CI) p-value | Model 3<br>(minimally adjusted) | Model 2<br>(age, sex) | Model 3<br>(minimally adjusted) |
| < 10 år                                         | ref                                       | ref                             | ref                   | ref                             |
| 10 – 15 år                                      | 1.37(1.25;1.51) 0.000                     | 1.37(1.24;1.50) 0.000           | 1.48(1.17;1.87) 0.001 | 1.46(1.16;1.85) 0.001           |
| > 15 år                                         | 1.57(1.42;1.74) 0.000                     | 1.56(1.40;1.73) 0.000           | 1.71(1.32;2.20) 0.000 | 1.68(1.30;2.16) 0.000           |
| Missings                                        | 1.02(0.85;1.24) 0.808                     | 1.06(0.87;1.28) 0.582           | 1.10(0.79;1.53) 0.568 | 1.15(0.82;1.62) 0.415           |

| Missings coded as educational attainment < 10 years |                                           |                                 |                        |                                 |
|-----------------------------------------------------|-------------------------------------------|---------------------------------|------------------------|---------------------------------|
|                                                     | Entire cohort (n=6649)                    |                                 | Nested cohort (n=1407) |                                 |
|                                                     | Model 2 (age, sex)<br>IRR(95% CI) p-value | Model 3<br>(minimally adjusted) | Model 2<br>(age, sex)  | Model 3<br>(minimally adjusted) |
| < 10 år                                             | ref                                       | ref                             | ref                    | ref                             |
| 10 – 15 år                                          | 1.37(1.25;1.49) 0.000                     | 1.35(1.23;1.48) 0.000           | 1.43(1.16;1.76) 0.001  | 1.40(1.14;1.72) 0.002           |
| > 15 år                                             | 1.56(1.41;1.72) 0.000                     | 1.54(1.40;1.70) 0.000           | 1.65(1.31;2.08) 0.000  | 1.61(1.28;2.02) 0.000           |

| Missings coded as educational attainment between 10 and 15 years |                                           |                                 |                        |                                 |
|------------------------------------------------------------------|-------------------------------------------|---------------------------------|------------------------|---------------------------------|
|                                                                  | Entire cohort (n=6649)                    |                                 | Nested cohort (n=1407) |                                 |
|                                                                  | Model 2 (age, sex)<br>IRR(95% CI) p-value | Model 3<br>(minimally adjusted) | Model 2<br>(age, sex)  | Model 3<br>(minimally adjusted) |
| < 10 år                                                          | ref                                       | ref                             | ref                    | ref                             |
| 10 – 15 år                                                       | 1.33(1.21;1.46) 0.000                     | 1.33(1.21;1.46) 0.000           | 1.38(1.10;1.73) 0.005  | 1.39(1.11;1.74) 0.004           |
| > 15 år                                                          | 1.57(1.42;1.74) 0.000                     | 1.56(1.41;1.73) 0.000           | 1.71(1.32;2.20) 0.000  | 1.68(1.30;2.16) 0.000           |

| Missings coded as educational attainment ≥ 15 years |                                           |                                 |                        |                                 |
|-----------------------------------------------------|-------------------------------------------|---------------------------------|------------------------|---------------------------------|
|                                                     | Entire cohort (n=6649)                    |                                 | Nested cohort (n=1407) |                                 |
|                                                     | Model 2 (age, sex)<br>IRR(95% CI) p-value | Model 3<br>(minimally adjusted) | Model 2<br>(age, sex)  | Model 3<br>(minimally adjusted) |
| < 10 år                                             | ref                                       | ref                             | ref                    | ref                             |
| 10 – 15 år                                          | 1.37(1.25;1.51) 0.000                     | 1.36(1.24;1.50) 0.000           | 1.48(1.17;1.86) 0.001  | 1.46(1.16;1.84) 0.001           |
| > 15 år                                             | 1.46(1.32;1.61) 0.000                     | 1.46(1.32;1.62) 0.000           | 1.47(1.16;1.86) 0.001  | 1.49(1.17;1.90) 0.001           |
